# Supplementary material for: Analysis of the bacterial communities associated with two ant–plant symbioses
Source: PubMed Central journal article supplement (PMC3633351; doi:10.1002/mbo3.73), 2013-02-17

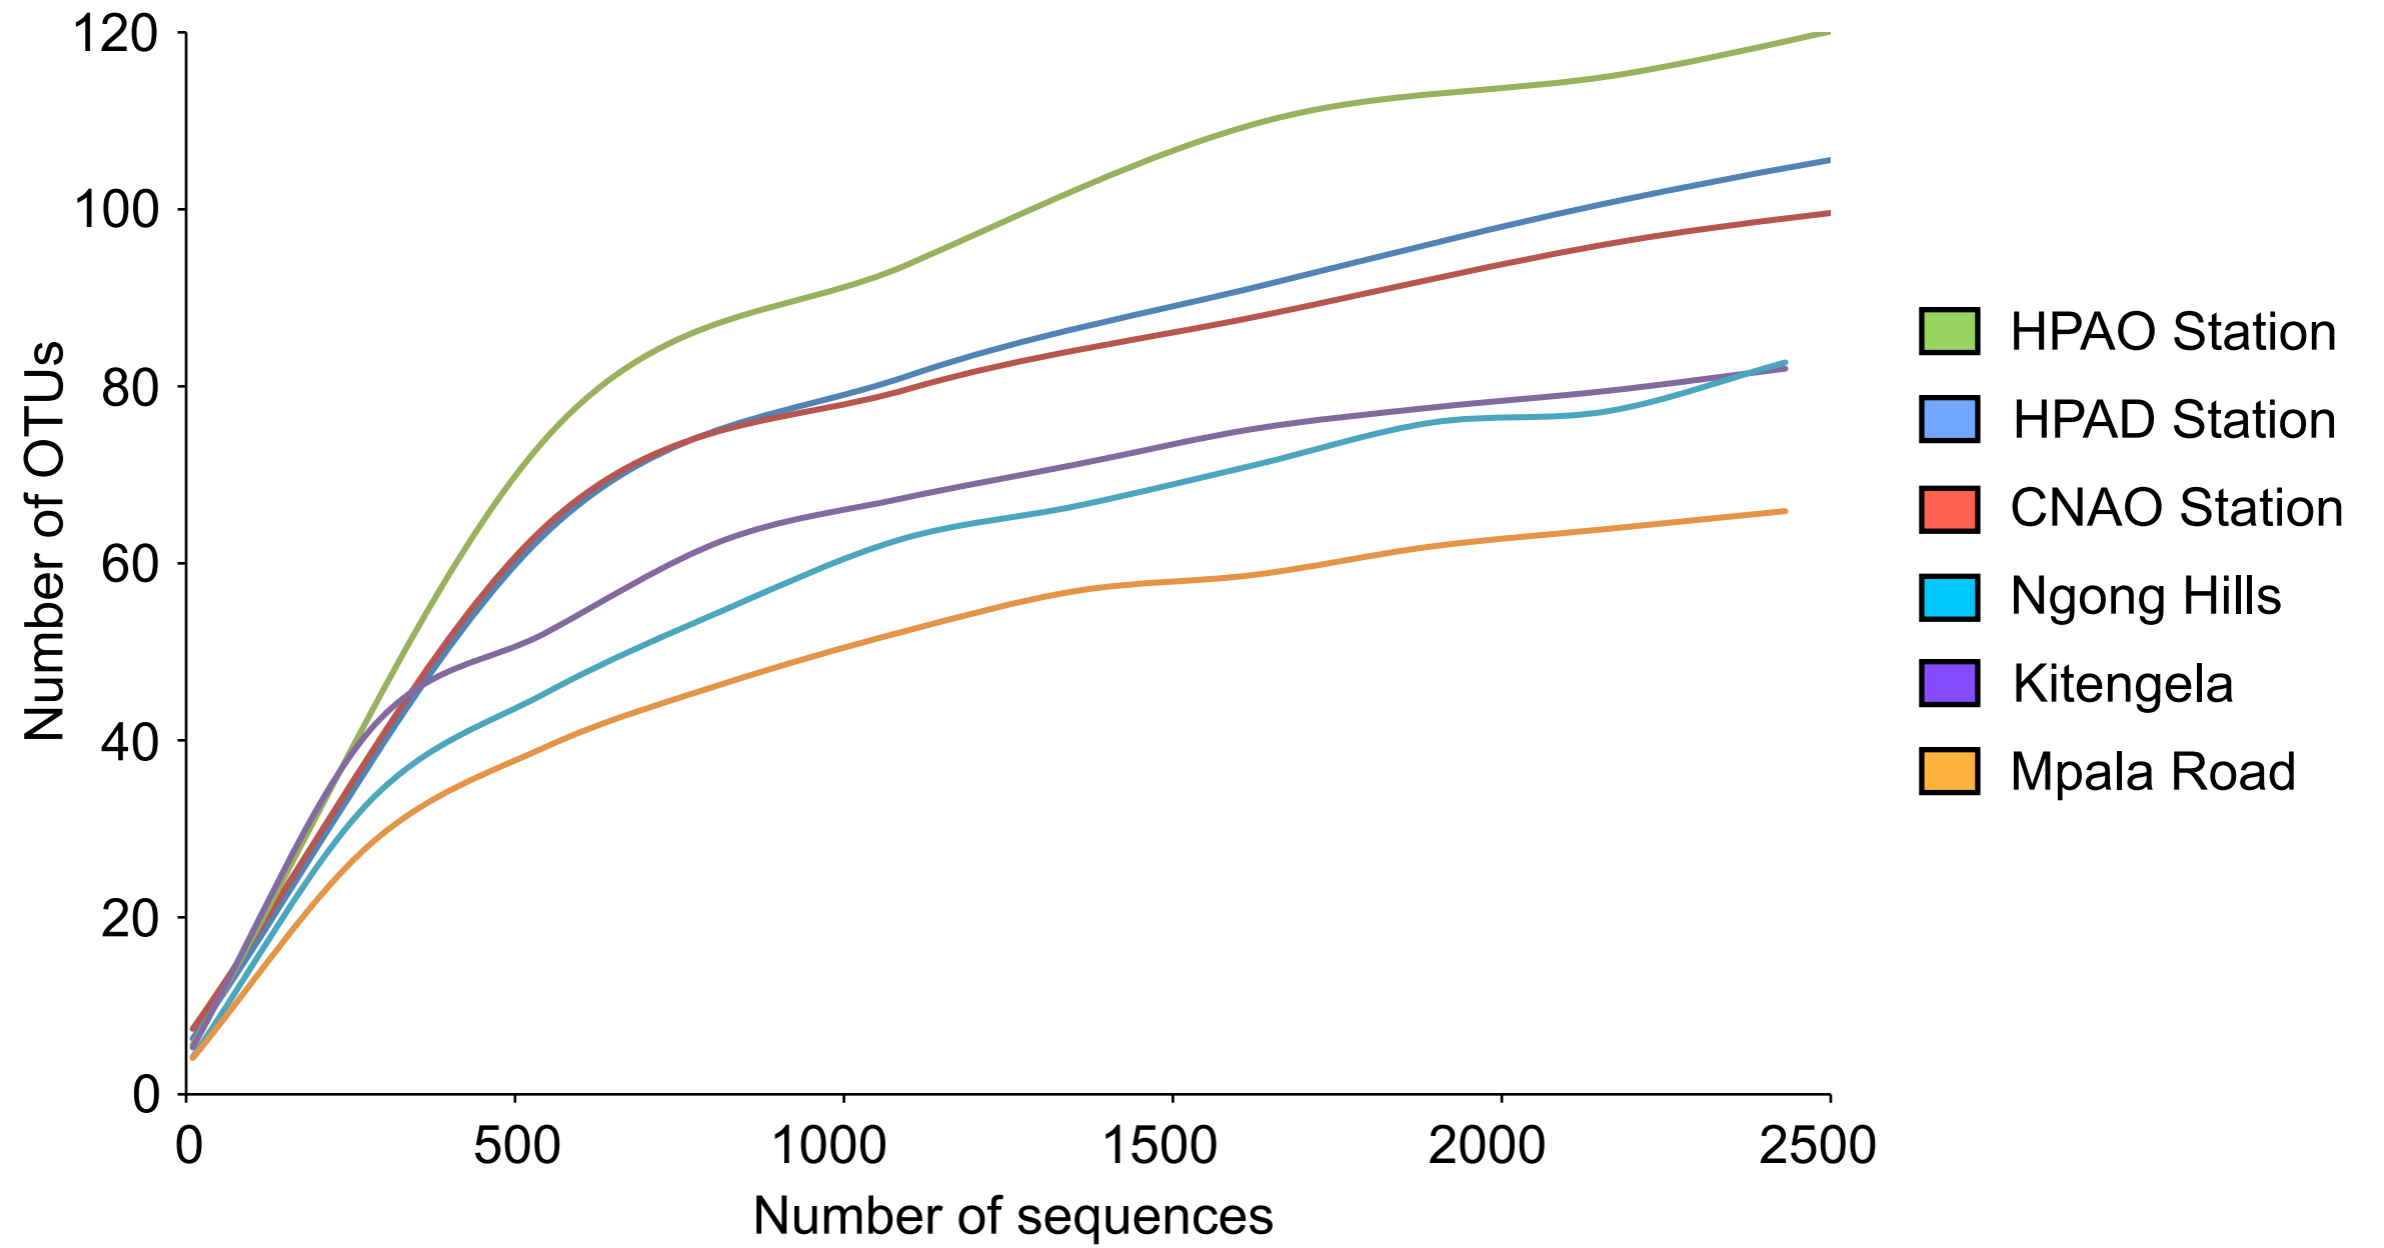

Supplement: mbo30002-0276-SD1.pdf [file mbo30002-0276-SD1.pdf]
