# Supplementary material for: Analysis of the bacterial communities associated with two ant–plant symbioses
Source: PubMed Central journal article supplement (PMC3633351; doi:10.1002/mbo3.73), 2013-02-17
Supplement: mbo30002-0276-SD2.pdf [file mbo30002-0276-SD2.pdf]

| Class                    | <i>Allomerus</i> |      | <i>Tetraponera</i> |      |
|--------------------------|------------------|------|--------------------|------|
|                          | % of pyrotags    | OTUs | % of pyrotags      | OTUs |
| $\alpha$ -proteobacteria | 28.7             | 38.9 | 8.2                | 29.7 |
| $\beta$ -proteobacteria  | 2.8              | 11.5 | 0.6                | 9.3  |
| $\gamma$ -proteobacteria | 68.5             | 49.6 | 91.2               | 61.0 |

Table S1. Distribution of Proteobacteria within cuticular microbiomes *Allomerus* and *Tetraponera* ants. Values represent the average relative abundance of either pyrotags or OTUs classified as belonging to the phylum Proteobacteria.
