# Supplementary material for: Analysis of the bacterial communities associated with two ant–plant symbioses
Source: PubMed Central journal article supplement (PMC3633351; doi:10.1002/mbo3.73), 2013-02-17
Supplement: mbo30002-0276-SD3.pdf [file mbo30002-0276-SD3.pdf]

| Strain | Source location | Accession | Genus                    | Antifungal activity | Closest relative (accession, % identity)          |
|--------|-----------------|-----------|--------------------------|---------------------|---------------------------------------------------|
| T1     | Kitengela       | JX305999  | <i>Streptomyces</i>      | Y                   | <i>Streptomyces</i> sp. OA18 (JN942133, 100)      |
| T2     | Ngong Hills     | JX306000  | <i>Streptomyces</i>      | Y                   | <i>Streptomyces</i> sp. FXJ7.385 (JF346529, 100)  |
| T3     | Ngong Hills     | JX306001  | <i>Saccharopolyspora</i> | Y                   | <i>Saccharopolyspora</i> sp. 8-15 (HQ622522, 99)  |
| T4     | Ngong Hills     | JX306002  | <i>Streptomyces</i>      | N                   | <i>Streptomyces</i> sp. CPE1 (JN936839, 100)      |
| T7     | Kitengela       | JX306003  | <i>Saccharopolyspora</i> | Y                   | <i>Saccharopolyspora</i> sp. JAJ12 (JN859001, 99) |
| T21    | Ngong Hills     | JX306004  | <i>Saccharopolyspora</i> | Y                   | <i>Saccharopolyspora</i> sp. JAJ12 (JN859001, 99) |

**Table S2.** 16S identification of the antibiotic-producing actinobacteria genera from *Tetraponera* ants. Genbank accession numbers are given for the 16S sequences generated from this study and the closest relative and % identity is indicated. Bacteria were isolated and assessed for antifungal activity against *Candida albicans* as previously described (Seipke *et al.*, 2012b).
